# Supplementary material for: Tuning interfacial complexation in aqueous two phase systems with polyelectrolytes and nanoparticles for compound all water emulsion bodies (AWE-somes)
Source: Royal Society of Chemistry journal article supplement (doi:10.1039/c7cp02809a), 2017-01-01
Supplement: c7cp02809a1.pdf [file c7cp02809a1.pdf]

## Supplementary Information

### Tuning Interfacial Complexation in Aqueous Two Phase Systems with Polyelectrolytes and Nanoparticles for Compound All Water Emulsion Bodies (AWE-somes)

Sarah D. Hann, Daeyeon Lee\* and Kathleen J. Stebe\*

The data presented here are meant to support the main text. Included are fluorescence intensity of the encapsulated cargo at longer times of Figure 4g.

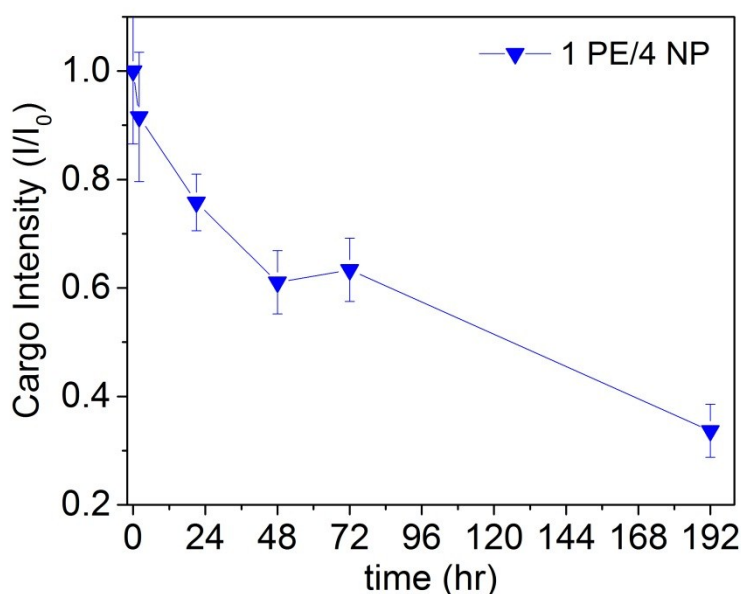

**Figure S1.** Release of encapsulated fluorescent dextran for  $PE_{0.5}/(PE_1, NP_4)$  1% PE+4% NP/PE compound microcapsule

In Figure 4, the  $PE_{0.5}/(PE_1, NP_4)$  compound microcapsules appeared to have plateaued in their release of fluorescent dextran. However at longer times, they do indeed release the remaining 30% of dextran, as shown in Figure S1.
